# Supplementary material
Source: MDPI journal article supplement (https://www.mdpi.com/2311-5629/8/3/46)
Supplement: s1 [file s1]

| Atomic %           | C     | O     | Na   | Mg   | Si   | P     | K    | Ca   | Cl             | Al             |
|--------------------|-------|-------|------|------|------|-------|------|------|----------------|----------------|
| Trial a            | 36.31 | 40.54 | 1.25 | 4.88 | 1.98 | 10.30 | 0.53 | 4.22 | -              | -              |
| Trial b            | 36.40 | 37.36 | 0.89 | 5.13 | 4.13 | 11.21 | 0.70 | 4.18 | -              | 0.01           |
| Trial c            | 32.34 | 40.74 | 2.35 | 5.45 | 1.87 | 11.47 | 0.42 | 5.13 | 0.23           | -              |
| Mean               | 35.02 | 39.55 | 1.50 | 5.15 | 2.66 | 10.99 | 0.55 | 4.51 | Not considered | Not considered |
| Standard Deviation | 2.32  | 1.90  | 0.76 | 0.29 | 1.27 | 0.61  | 0.14 | 0.54 | Not considered | Not considered |

Table S1: Percentage composition of B-MP obtained through EDX analysis.
